# Supplementary material
Source: publisher site journal article supplement (https://www.spandidos-publications.com/7584/downloadSupplementary)
Supplement: Supplementary file 1 [file downloadSupplementary]

Table SI. Oligonucleotide primers used for *PAH* gene sequencing.

| Primers | Forward primer (5'-3')  | Reverse primer 5'-3')    | Product size (bp) |
|---------|-------------------------|--------------------------|-------------------|
| Ex 1    | ACCCTTTGTAACCTCTTCTCCT  | ACTGAGCTTATGAAACCAGGAAG  | 283               |
| Ex 2    | AAAGAGTTCATGCTTGCTTTGT  | TCCAGATCCTGTGTTCTTTTCA   | 297               |
| Ex 3    | TCCTGTTCTGGTTCTGCATCT   | ATGAAGACAGTGTGGAGTACTT   | 311               |
| Ex 4    | CAGCCCACTTGCCATCAC      | TTCCAGCCCTCGTGTAAT       | 346               |
| Ex 5    | TAACCAAGGGAAGGAGACATGC  | AACTGGATGAGGGCAAGGGA     | 264               |
| Ex 6    | CTCCCTCTGCTAACCTAACCTG  | TCATACTTGCCCTCCACATACTTG | 372               |
| Ex 7    | ATCTGAAGCCAAGTCTGCCT    | AGCCAGCAATGAACCCAAAC     | 364               |
| Ex 8    | GCCCATTCCTCATGTAGAAAGAC | TAGCTTCCCAGAACCACACA     | 312               |
| Ex 9    | GGCCACCCATCACCTTTT      | TCCAGGGGAGTAGGAAAGTT     | 234               |
| Ex 10   | CCCTCCAGAAACACCCTCAT    | GAATGAGTTCACAGGTTGCA     | 362               |
| Ex 11   | GTGTAGAAGGAATCGGGGTGAG  | GGAGAACATGGGAGAGAACTG    | 390               |
| Ex 12   | GAGGTGTCCGTGTTCCCTAAA   | GTTCTTCTCCATCAATGAACCCA  | 380               |
| Ex 13   | GCTCCTTGAAAGTTGGGGTG    | AAGGTTTGCTTTTCGGACTTTT   | 270               |
| M13     | TGTAAAACGACGGCCAGT      | CAGGAAACAGCTATGACC       |                   |

Table SII. Summary of demographic and clinical characteristics of patients with PKU.

| Family | Consanguinity <sup>a</sup> | Patients (n=77)  | Age <sup>b</sup> | Sex | Allele 1            | Allele 2            | APVs | Observed phenotypes | Predicted phenotypes |
|--------|----------------------------|------------------|------------------|-----|---------------------|---------------------|------|---------------------|----------------------|
| PKU-1  | First cousins              | PKU-1-1 (Index)  | 10 Mo            | M   | c.143T>C            | c.143T>C            | 2    | Classic PKU         | Classic-Mild PKU     |
|        |                            | PKU-1-2 (Index)  | 11 Mo            | M   | c.143T>C            | c.143T>C            | 2    | Classic PKU         | Classic-Mild PKU     |
| PKU-2  | First cousins              | PKU-2-1 (Index)  | 2 Mo             | M   | c.143T>C            | c.143T>C            | 2    | Classic PKU         | Classic-Mild PKU     |
| PKU-3  | Second cousins             | PKU-3-1 (Index)  | 6 Y              | M   | c.116_118del        | c.116_118del        | 0.7  | Classic PKU         | Classic PKU          |
| PKU-4  | Second cousins             | PKU-4-1 (Index)  | 6 Y              | M   | c.155del            | c.155del            | 0    | Classic PKU         | Classic PKU          |
| PKU-5  | First cousins              | PKU-5-1 (Index)  | 2 Mo             | F   | c.168_168+1delinsAA | c.168_168+1delinsAA | 0    | Classic PKU         | Classic PKU          |
| PKU-6  | First cousins              | PKU-6-1 (Index)  | 1 Y              | M   | c.168_168+1delinsAA | c.168_168+1delinsAA | 0    | Classic PKU         | Classic PKU          |
| PKU-7  | First cousins              | PKU-7-1 (Index)  | 26 Y             | M   | c.168_168+1delinsAA | c.168_168+1delinsAA | 0    | Classic PKU         | Classic PKU          |
|        |                            | PKU-7-2 (Index)  | 30 Y             | F   | c.168_168+1delinsAA | c.168_168+1delinsAA | 0    | Classic PKU         | Classic PKU          |
| PKU-8  | First cousins              | PKU-8-1 (Index)  | 1 Y              | F   | c.168_168+1delinsAA | c.168_168+1delinsAA | 0    | Classic PKU         | Classic PKU          |
| PKU-9  | Not relatives              | PKU-9-1 (Index)  | 14 Y             | M   | c.168_168+1delinsAA | c.168_168+1delinsAA | 0    | Classic PKU         | Classic PKU          |
|        |                            | PKU-9-2 (Index)  | 10 Y             | M   | c.168_168+1delinsAA | c.168_168+1delinsAA | 0    | Classic PKU         | Classic PKU          |
| PKU-10 | First cousins              | PKU-10-1 (Index) | 20 Y             | F   | c.168_168+1delinsAA | c.168_168+1delinsAA | 0    | Classic PKU         | Classic PKU          |
| PKU-11 | First cousins              | PKU-11-1 (Index) | 17 Y             | F   | c.168_168+1delinsAA | c.168_168+1delinsAA | 0    | Classic PKU         | Classic PKU          |
| PKU-12 | First cousins              | PKU-12-1 (Index) | 8 Y              | M   | c.168_168+1delinsAA | c.168_168+1delinsAA | 0    | Classic PKU         | Classic PKU          |
| PKU-13 | First cousins              | PKU-13-1 (Index) | 20 Y             | M   | c.169_171del        | c.169_171del        | 0    | Classic PKU         | Classic PKU          |
|        |                            | PKU-13-2 (Index) | 8 Y              | M   | c.169_171del        | c.169_171del        | 0    | Classic PKU         | Classic PKU          |
| PKU-14 | First cousins              | PKU-14-1 (Index) | 5 Y              | M   | c.169_171del        | c.169_171del        | 0    | Classic PKU         | Classic PKU          |
| PKU-15 | First cousins              | PKU-15-1 (Index) | 1 Y              | F   | c.169_171del        | c.169_171del        | 0    | Classic PKU         | Classic PKU          |
| PKU-16 | First cousins              | PKU-16-1 (Index) | 6 Y              | F   | c.169_171del        | c.169_171del        | 0    | Classic PKU         | Classic PKU          |

|        |                |                     |      |   |              |              |     |             |             |
|--------|----------------|---------------------|------|---|--------------|--------------|-----|-------------|-------------|
|        |                | PKU-16-2<br>(Index) | 1 Mo | M | c.169_171del | c.169_171del | 0   | Classic PKU | Classic PKU |
| PKU-17 | First cousins  | PKU-17-1<br>(Index) | 8 Y  | M | c.441+5G>T   | c.441+5G>T   | 4.2 | Classic PKU | Classic PKU |
|        |                | PKU-17-2<br>(Index) | 14 Y | F | c.441+5G>T   | c.441+5G>T   | 4.2 | Classic PKU | Classic PKU |
| PKU-18 | Second cousins | PKU-18-1<br>(Index) | 3 Y  | F | c.441+5G>T   | c.441+5G>T   | 4.2 | Classic PKU | Classic PKU |
| PKU-19 | First cousins  | PKU-19-1<br>(Index) | 17 Y | F | c.441+5G>T   | c.441+5G>T   | 4.2 | Classic PKU | Classic PKU |
|        |                | PKU-19-2<br>(Index) | 4 Y  | M | c.441+5G>T   | c.441+5G>T   | 4.2 | Classic PKU | Classic PKU |
|        |                | PKU-19-3<br>(Index) | 19 Y | F | c.441+5G>T   | c.441+5G>T   | 4.2 | Classic PKU | Classic PKU |
|        |                | PKU-19-4<br>(Index) | 21 Y | M | c.441+5G>T   | c.441+5G>T   | 4.2 | Classic PKU | Classic PKU |
| PKU-20 | Second cousins | PKU-20-1<br>(Index) | 9 Y  | F | c.441+5G>T   | c.441+5G>T   | 4.2 | Classic PKU | Classic PKU |
|        |                | PKU-20-2<br>(Index) | 9 Y  | M | c.441+5G>T   | c.441+5G>T   | 4.2 | Classic PKU | Classic PKU |
| PKU-21 | First cousins  | PKU-21-1<br>(Index) | 11 Y | F | c.441+5G>T   | c.441+5G>T   | 4.2 | Classic PKU | Classic PKU |
|        |                | PKU-21-2<br>(Index) | 2 Mo | M | c.441+5G>T   | c.441+5G>T   | 4.2 | Classic PKU | Classic PKU |
| PKU-22 | First cousins  | PKU-22-1<br>(Index) | 1 Y  | F | c.509+1G>A   | c.509+1G>A   | 0   | Classic PKU | Classic PKU |
|        |                | PKU-22-2<br>(Index) | 3 Y  | F | c.509+1G>A   | c.509+1G>A   | 0   | Classic PKU | Classic PKU |
| PKU-23 | Second cousins | PKU-23-1<br>(Index) | 9 Y  | M | c.526C>T     | c.526C>T     | 0   | Classic PKU | Classic PKU |
| PKU-24 | Second cousins | PKU-24-1<br>(Index) | 16 Y | M | c.526C>T     | c.526C>T     | 0   | Classic PKU | Classic PKU |
|        |                | PKU-24-2<br>(Index) | 6 Y  | F | c.526C>T     | c.526C>T     | 0   | Classic PKU | Classic PKU |
| PKU-25 | Second cousins | PKU-25-1<br>(Index) | 3 Y  | M | c.526C>T     | c.526C>T     | 0   | Classic PKU | Classic PKU |

|        |                |                  |      |   |              |              |     |             |             |
|--------|----------------|------------------|------|---|--------------|--------------|-----|-------------|-------------|
| PKU-26 | Second cousins | PKU-26-1 (Index) | 6 Y  | M | c.526C>T     | c.526C>T     | 0   | Classic PKU | Classic PKU |
| PKU-27 | Second cousins | PKU-27-1 (Index) | 17 Y | M | c.593_614del | c.593_614del | 0   | Classic PKU | Classic PKU |
|        |                | PKU-27-2 (Index) | 11 Y | M | c.593_614del | c.593_614del | 0   | Classic PKU | Classic PKU |
|        |                | PKU-27-3 (Index) | 11 Y | M | c.593_614del | c.593_614del | 0   | Classic PKU | Classic PKU |
|        |                | PKU-27-4 (Index) | 11 Y | M | c.593_614del | c.593_614del | 0   | Classic PKU | Classic PKU |
| PKU-28 | First cousins  | PKU-28-1 (Index) | 2 Y  | F | c.781del     | c.781del     | NA  | NA          | NA          |
|        |                | PKU-28-2 (Index) | 1 Y  | M | c.781del     | c.781del     | NA  | NA          | NA          |
| PKU-29 | First cousins  | PKU-29-1 (Index) | 8 Y  | F | c.782G>A     | c.782G>A     | 1.7 | Classic PKU | Classic PKU |
| PKU-30 | First cousins  | PKU-30-1 (Index) | 17 Y | F | c.810A>T     | c.810A>T     | 0   | Classic PKU | Classic PKU |
| PKU-31 | First cousins  | PKU-31-1 (Index) | 13 Y | M | c.810A>T     | c.810A>T     | 0   | Classic PKU | Classic PKU |
|        |                | PKU-31-2 (Index) | 5 Y  | M | c.810A>T     | c.810A>T     | 0   | Classic PKU | Classic PKU |
| PKU-32 | First cousins  | PKU-32-1 (Index) | 8 Y  | M | c.810A>T     | c.810A>T     | 0   | Classic PKU | Classic PKU |
| PKU-33 | First cousins  | PKU-33-1 (Index) | 3 Y  | M | c.842C>T     | c.842C>T     | 0   | Classic PKU | Classic PKU |
| PKU-34 | First cousins  | PKU-34-1 (Index) | 2 Y  | M | c.1066-11G>A | c.1066-11G>A | 0   | Classic PKU | Classic PKU |
| PKU-35 | Second cousins | PKU-35-1 (Index) | 4 Y  | M | c.1066-11G>A | c.1066-11G>A | 0   | Classic PKU | Classic PKU |
| PKU-36 | Second cousins | PKU-36-1 (Index) | 11 Y | M | c.1066-11G>A | c.1066-11G>A | 0   | Classic PKU | Classic PKU |
|        |                | PKU-36-2 (Index) | 7 Y  | F | c.1066-11G>A | c.1066-11G>A | 0   | Classic PKU | Classic PKU |
| PKU-37 | Not relatives  | PKU-37-1 (Index) | 23 Y | F | c.1066-11G>A | c.1066-11G>A | 0   | Classic PKU | Classic PKU |

|        |                |                  |      |   |                     |              |    |             |             |
|--------|----------------|------------------|------|---|---------------------|--------------|----|-------------|-------------|
| PKU-38 | Second cousins | PKU-38-1 (Index) | 8 Y  | M | c.1066-11G>A        | c.1066-11G>A | 0  | Classic PKU | Classic PKU |
|        |                | PKU-38-2 (Index) | 5 Y  | F | c.1066-11G>A        | c.1066-11G>A | 0  | Classic PKU | Classic PKU |
|        |                | PKU-38-3 (Index) | 3 Y  | F | c.1066-11G>A        | c.1066-11G>A | 0  | Classic PKU | Classic PKU |
| PKU-39 | First cousins  | PKU-39-1 (Index) | 5 Y  | M | c.1066-11G>A        | c.1066-11G>A | 0  | Classic PKU | Classic PKU |
|        |                | PKU-39-2 (Index) | 3 Y  | M | c.1066-11G>A        | c.1066-11G>A | 0  | Classic PKU | Classic PKU |
| PKU-40 | Second cousins | PKU-40-1 (Index) | 18 Y | M | c.1089del           | c.1089del    | 0  | Classic PKU | Classic PKU |
|        |                | PKU-40-2 (Index) | 16 Y | M | c.1089del           | c.1089del    | 0  | Classic PKU | Classic PKU |
| PKU-41 | First cousins  | PKU-41-1 (Index) | 4 Y  | M | c.1162G>A           | c.1162G>A    | 2  | Classic PKU | Classic PKU |
|        |                | PKU-41-2 (Index) | 15 Y | M | c.1162G>A           | c.1162G>A    | 2  | Classic PKU | Classic PKU |
|        |                | PKU-41-3 (Index) | 17 Y | F | c.1162G>A           | c.1162G>A    | 2  | Classic PKU | Classic PKU |
| PKU-42 | First cousins  | PKU-42-1 (Index) | 11 Y | F | c.1162G>A           | c.1162G>A    | 2  | Classic PKU | Classic PKU |
| PKU-43 | First cousins  | PKU-43-1 (Index) | 6 Y  | M | c.1199+1G>C         | c.1199+1G>C  | 0  | Classic PKU | Classic PKU |
| PKU-44 | Second cousins | PKU-44-1 (Index) | 8 Y  | M | c.168_168+1delinsAA | c.169_171del | NA | NA          | NA          |
| PKU-45 | Not relatives  | PKU-45-1 (Index) | 13 Y | M | c.526C>T            | c.441+5G>T   | NA | NA          | NA          |
| PKU-46 | Not relatives  | PKU-46-1 (Index) | 11 Y | M | c.782G>A            | c.838G>A     | NA | NA          | NA          |
| PKU-47 | Second cousins | PKU-47-1 (Index) | 3 Y  | F | c.727C>T            | c.441+5G>T   | NA | NA          | NA          |
|        |                | PKU-47-1 (Index) | 2 Y  | M | c.727C>T            | c.441+5G>T   | NA | NA          | NA          |
|        |                | PKU-47-1 (Index) | 1 Y  | F | c.727C>T            | c.441+5G>T   | NA | NA          | NA          |
| PKU-48 | Not relatives  | PKU-48-1 (Index) | 1 Mo | M | c.898G>T            | c.1066-11G>A | NA | NA          | NA          |

|        |               |                     |      |   |              |           |    |    |    |
|--------|---------------|---------------------|------|---|--------------|-----------|----|----|----|
| PKU-49 | Not relatives | PKU-49-1<br>(Index) | 2 Mo | F | c.969+5G>A   | c.1208C>T | NA | NA | NA |
| PKU-50 | Not relatives | PKU-50-1<br>(Index) | 3 Mo | F | c.1066-11G>A | c.1222C>T | NA | NA | NA |

<sup>a</sup>, Parental consanguinity. <sup>b</sup>, age at investigations. PKU, phenylketonuria; Mo, months; Y, year, M, male; F, female; NA, not available.
